# Supplementary material for: Factors influencing adherence in a trial of early introduction of allergenic food
Source: PubMed Central journal article supplement (PMC6904906; doi:10.1016/j.jaci.2019.06.046), 2019-12

### A. Number of foods

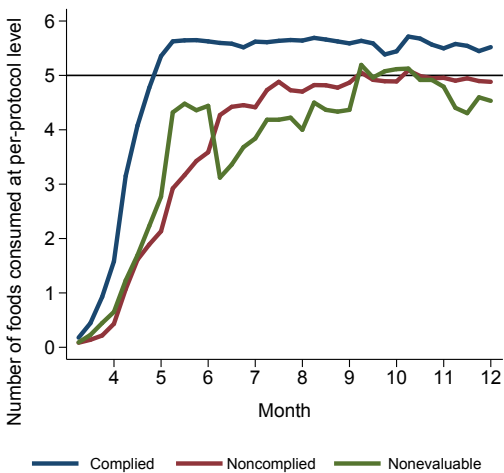

### B. Percentage achieving 5 or more foods

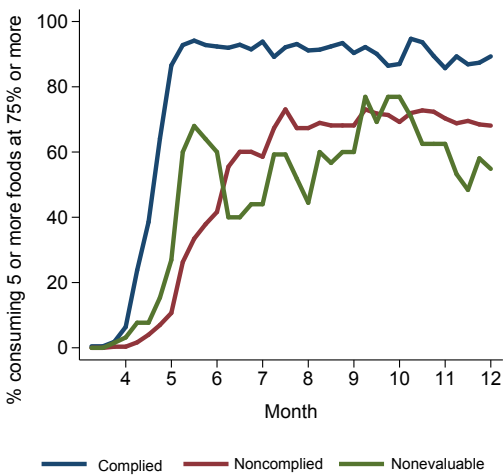

### C. IQ completion by nonevaluable participants (N=123)

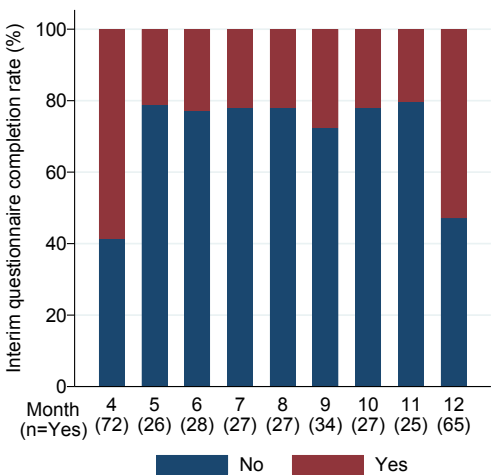

Supplement: mmc4.pdf [file mmc4.pdf]
