# Supplementary material for: Factors influencing adherence in a trial of early introduction of allergenic food
Source: PubMed Central journal article supplement (PMC6904906; doi:10.1016/j.jaci.2019.06.046), 2019-12

A: Ethnicity

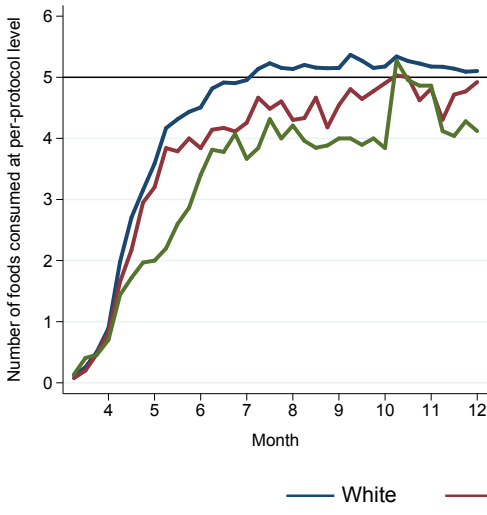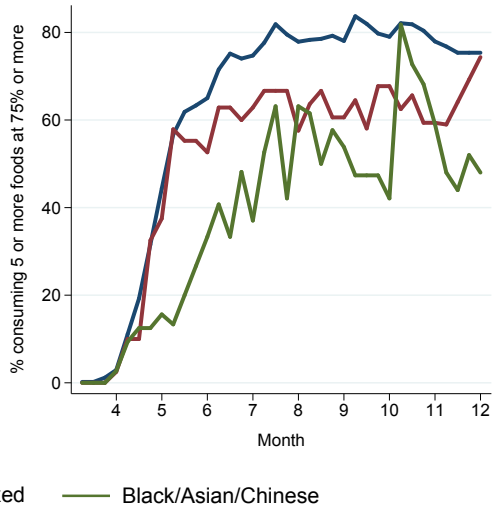

B: Maternal age

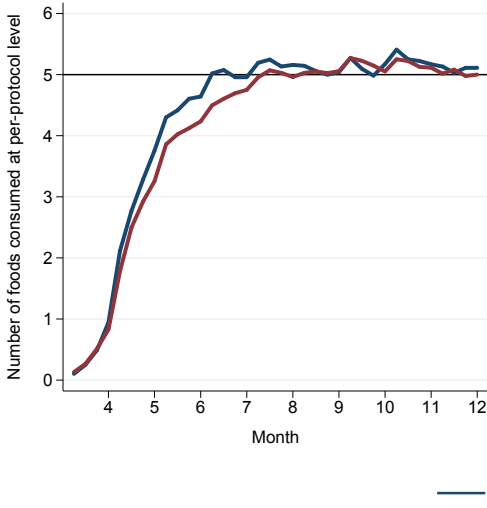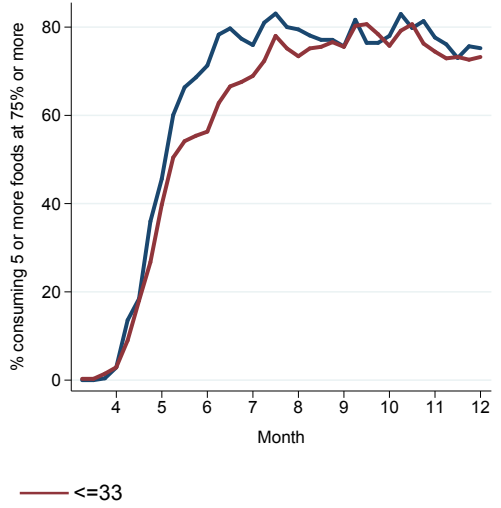

C: Eczema severity

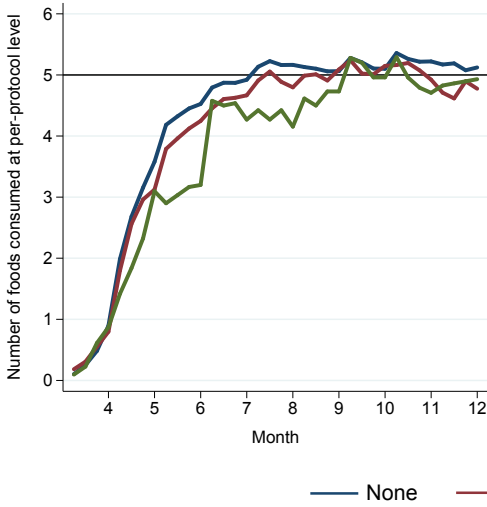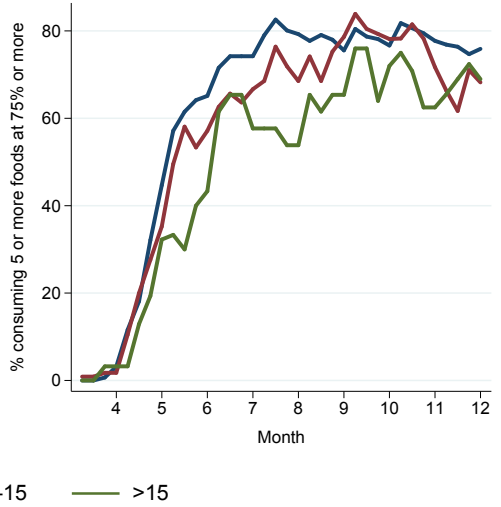

D: Feeding difficulty 4m

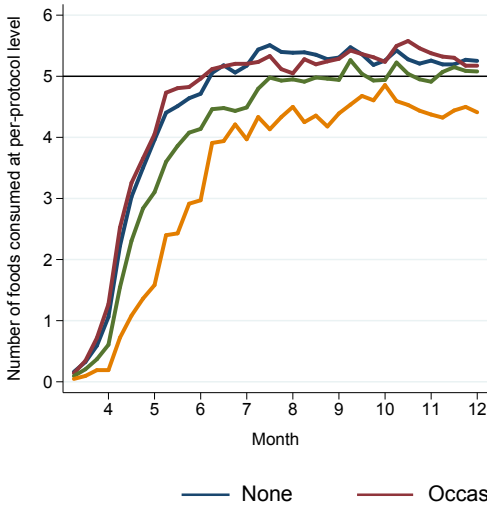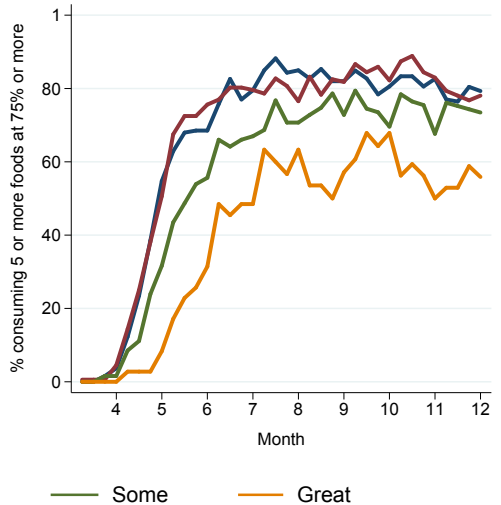

Supplement: mmc6.pdf [file mmc6.pdf]
