# Supplementary material for: Factors influencing adherence in a trial of early introduction of allergenic food
Source: PubMed Central journal article supplement (PMC6904906; doi:10.1016/j.jaci.2019.06.046), 2019-12
Supplement: mmc7.pdf [file mmc7.pdf]

|                                                                         |                                                           |                                                |                                                |                                                |                                           |               |                                            |                                                |
|-------------------------------------------------------------------------|-----------------------------------------------------------|------------------------------------------------|------------------------------------------------|------------------------------------------------|-------------------------------------------|---------------|--------------------------------------------|------------------------------------------------|
| EIG allergy to individual foods                                         | Primary outcome<br>Allergy to one or more foods<br>(n=28) | <b>7.33</b><br>(2.54-21.1)<br><b>&lt;0.001</b> | <b>7.62</b><br>(2.98-19.4)<br><b>&lt;0.001</b> | <b>16.2</b><br>(6.59-40.0)<br><b>&lt;0.001</b> | <b>4.17</b><br>(1.00-17.4)<br><b>0.05</b> | -<br>-<br>-   | <b>4.01</b><br>(1.18-13.6)<br><b>0.03</b>  | <b>8.35</b><br>(3.79-18.4)<br><b>&lt;0.001</b> |
|                                                                         | Wheat<br>(n=1)                                            | <b>72.8</b><br>(2.88-1842)<br><b>0.009</b>     | <b>50.0</b><br>(1.99-1253)<br><b>0.02</b>      | <b>53.8</b><br>(2.14-1352)<br><b>0.02</b>      | 13.3<br>(0.51-342)<br>0.12                | -<br>-<br>-   | <b>76.7</b><br>(3.03-1943)<br><b>0.009</b> | 16.7<br>(0.67-413)<br>0.09                     |
|                                                                         | Fish<br>(n=0)                                             | 23.2<br>(0.45-1196)<br>0.12                    | 15.6<br>(0.3-799)<br>0.17                      | 17.4<br>(0.34-890)<br>0.16                     | 36.9<br>(0.71-1931)<br>0.07               | -<br>-<br>-   | 24.4<br>(0.47-1259)<br>0.11                | 5.42<br>(0.11-275)<br>0.40                     |
|                                                                         | Sesame<br>(n=2)                                           | 4.62<br>(0.22-99.2)<br>0.33                    | <b>16.1</b><br>(1.62-159)<br><b>0.02</b>       | 3.46<br>(0.16-73.7)<br>0.43                    | <b>39.8</b><br>(3.87-410)<br><b>0.002</b> | -<br>-<br>-   | 4.85<br>(0.23-104)<br>0.31                 | 5.47<br>(0.56-53.3)<br>0.14                    |
|                                                                         | Milk<br>(n=2)                                             | <b>25.4</b><br>(2.52-255)<br><b>0.006</b>      | 3.56<br>(0.17-76.0)<br>0.42                    | <b>100.5</b><br>(4.70-2151)<br><b>0.003</b>    | 13.2<br>(0.51-340)<br>0.12                | -<br>-<br>-   | <b>80.5</b><br>(3.17-2044)<br><b>0.008</b> | <b>29.2</b><br>(1.39-615)<br><b>0.03</b>       |
|                                                                         | Egg<br>(n=20)                                             | <b>5.86</b><br>(1.68-20.5)<br><b>0.006</b>     | <b>9.36</b><br>(3.38-26.0)<br><b>&lt;0.001</b> | <b>14.1</b><br>(5.14-38.5)<br><b>&lt;0.001</b> | 3.10<br>(0.53-17.9)<br>0.21               | -<br>-<br>-   | 3.70<br>(0.91-15.1)<br>0.07                | <b>8.54</b><br>(3.40-21.5)<br><b>&lt;0.001</b> |
|                                                                         | Peanut<br>(n=7)                                           | <b>20.7</b><br>(4.75-90.2)<br><b>&lt;0.001</b> | <b>7.47</b><br>(1.60-34.8)<br><b>0.01</b>      | <b>15.5</b><br>(3.63-66.6)<br><b>&lt;0.001</b> | <b>9.06</b><br>(1.41-58.3)<br><b>0.02</b> | -<br>-<br>-   | 5.82<br>(0.93-36.3)<br>0.06                | <b>7.35</b><br>(1.78-30.4)<br><b>0.006</b>     |
|                                                                         |                                                           | Peanut<br>(n=24)                               | Egg<br>(n=36)                                  | Milk<br>(n=32)                                 | Sesame<br>(n=15)                          | Fish<br>(n=0) | Wheat<br>(n=25)                            | One or more foods<br>(n=93)                    |
| EIG Food-specific IgE sensitization at enrollment (0.1 kU/l or greater) |                                                           |                                                |                                                |                                                |                                           |               |                                            |                                                |
