# Supplementary material for: Factors influencing adherence in a trial of early introduction of allergenic food
Source: PubMed Central journal article supplement (PMC6904906; doi:10.1016/j.jaci.2019.06.046), 2019-12
Supplement: mmc8.pdf [file mmc8.pdf]

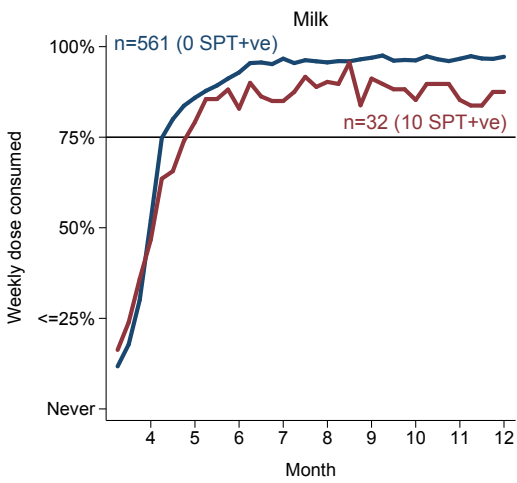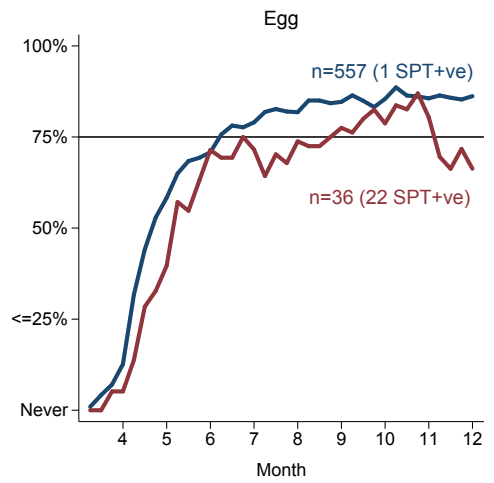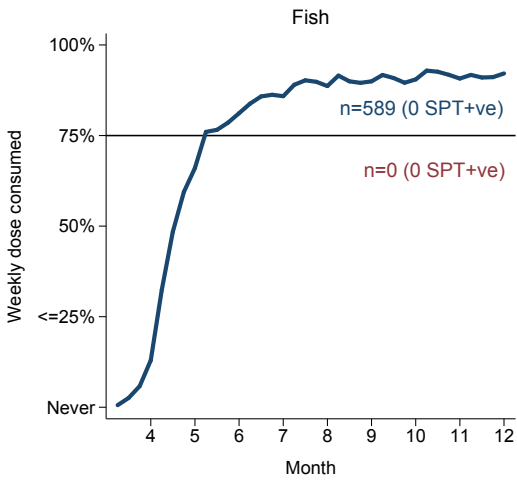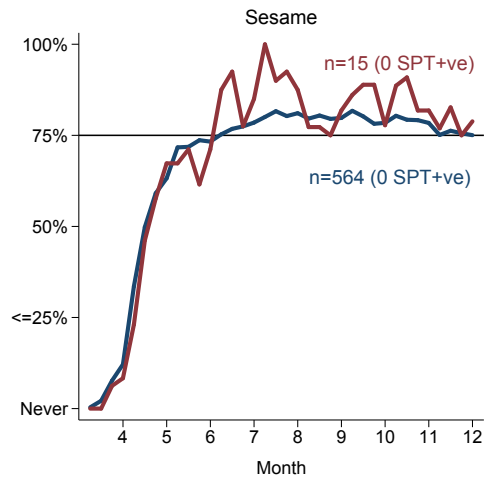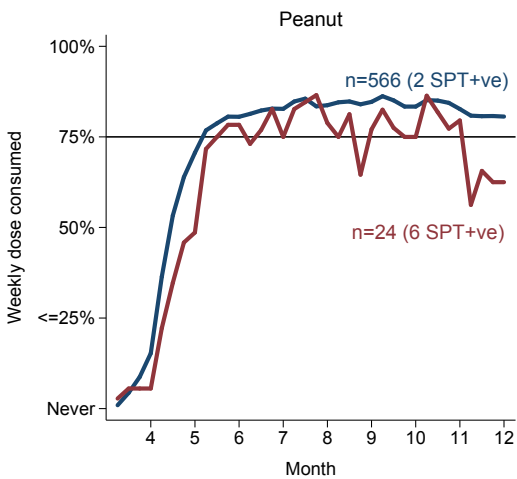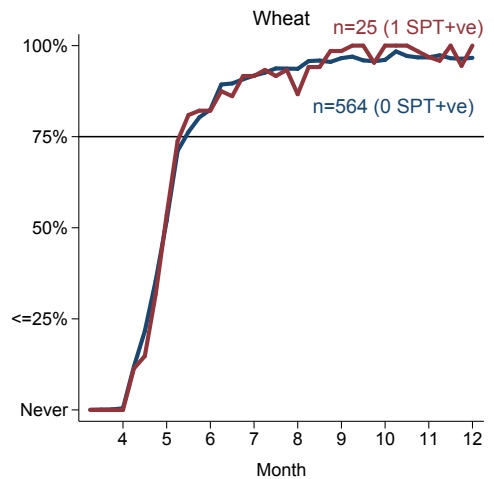

— Not sensitized — Sensitized (0.1 kU/l or greater)
