# Supplementary material for: Factors influencing adherence in a trial of early introduction of allergenic food
Source: PubMed Central journal article supplement (PMC6904906; doi:10.1016/j.jaci.2019.06.046), 2019-12
Supplement: mmc9.pdf [file mmc9.pdf]

A. Symptoms with one or more of six early introduction foods

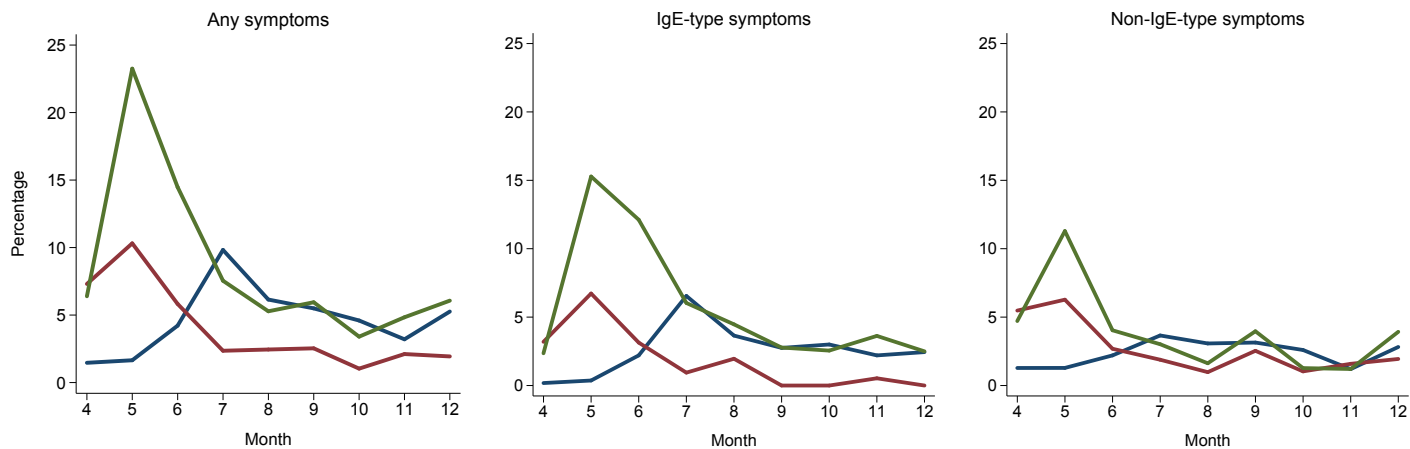

B. Symptoms with any other food

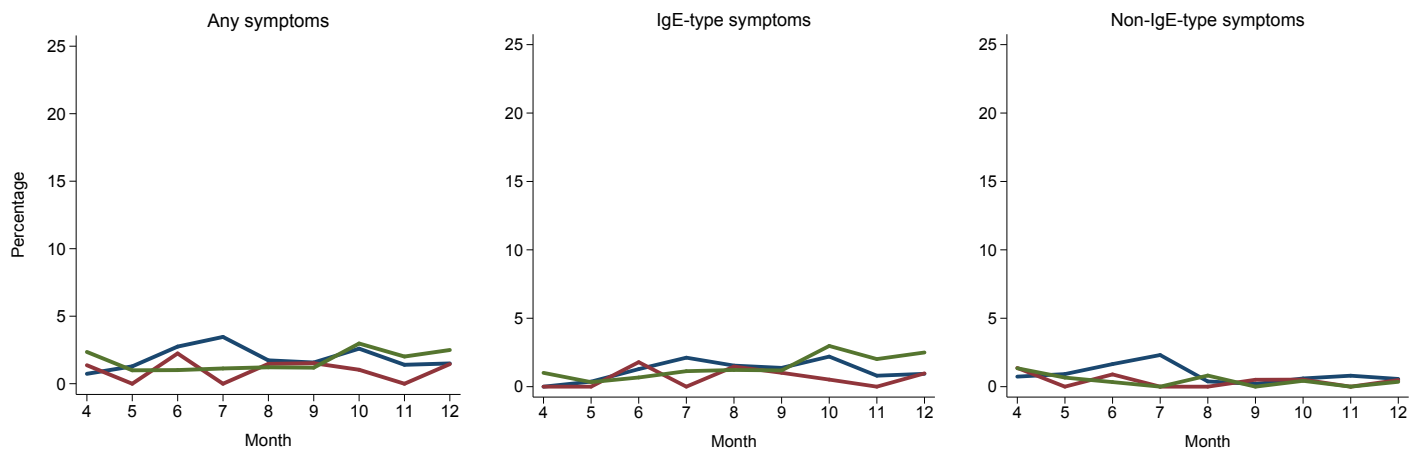

A. or B. Symptoms with any food

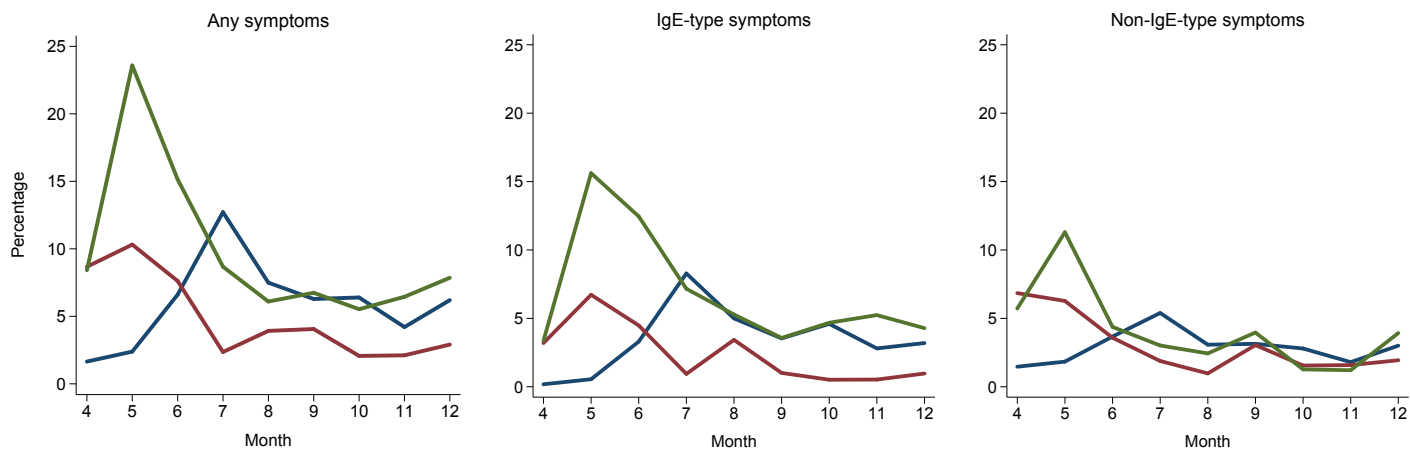

— SIG Complied    
 — EIG complied    
 — EIG non-compliant
