# Supplementary material for: Factors influencing adherence in a trial of early introduction of allergenic food
Source: PubMed Central journal article supplement (PMC6904906; doi:10.1016/j.jaci.2019.06.046), 2019-12
Supplement: mmc10.pdf [file mmc10.pdf]

|                                                         |                                                           |                             |                                                       |                                                   |                                                  |                                                  |                                                  |                                                       |                                                       |
|---------------------------------------------------------|-----------------------------------------------------------|-----------------------------|-------------------------------------------------------|---------------------------------------------------|--------------------------------------------------|--------------------------------------------------|--------------------------------------------------|-------------------------------------------------------|-------------------------------------------------------|
| EIG allergy to individual foods                         | Primary outcome<br>Allergy to one or more foods<br>(n=28) | 1.25<br>(0.23-6.83)<br>0.80 | <b>7.34</b><br><b>(3.31-16.3)</b><br><b>&lt;0.001</b> | <b>5.09</b><br><b>(1.97-13.2)</b><br><b>0.001</b> | 1.48<br>(0.27-8.21)<br>0.65                      | 1.80<br>(0.09-34.1)<br>0.70                      | 4.55<br>(0.72-28.7)<br>0.11                      | <b>7.01</b><br><b>(3.35-14.7)</b><br><b>&lt;0.001</b> | <b>6.71</b><br><b>(3.17-14.2)</b><br><b>&lt;0.001</b> |
|                                                         | Wheat<br>(n=1)                                            | 8.59<br>(0.34-217)<br>0.19  | 3.36<br>(0.14-83.7)<br>0.46                           | 5.48<br>(0.22-137)<br>0.30                        | 10.1<br>(0.40-257)<br>0.16                       | <b>40.3</b><br><b>(1.44-1130)</b><br><b>0.03</b> | <b>27.8</b><br><b>(1.03-749)</b><br><b>0.05</b>  | 1.60<br>(0.06-39.7)<br>0.77                           | 2.23<br>(0.09-55.2)<br>0.63                           |
|                                                         | Fish<br>(n=0)                                             | 8.61<br>(0.34-217)<br>0.19  | 3.37<br>(0.14-83.8)<br>0.46                           | 5.49<br>(0.22-137)<br>0.30                        | 10.1<br>(0.40-258)<br>0.16                       | <b>40.4</b><br><b>(1.44-1131)</b><br><b>0.03</b> | <b>27.9</b><br><b>(1.04-750)</b><br><b>0.05</b>  | 1.61<br>(0.06-39.7)<br>0.77                           | 20.1<br>(0.81-498)<br>0.07                            |
|                                                         | Sesame<br>(n=2)                                           | 3.68<br>(0.18-73.5)<br>0.39 | 1.44<br>(0.07-28.3)<br>0.81                           | 2.34<br>(0.12-46.3)<br>0.58                       | 4.33<br>(0.22-87.1)<br>0.34                      | 17.3<br>(0.77-385)<br>0.07                       | 11.9<br>(0.56-254)<br>0.11                       | 0.69<br>(0.04-13.4)<br>0.80                           | 4.00<br>(0.52-30.7)<br>0.18                           |
|                                                         | Milk<br>(n=2)                                             | 3.65<br>(0.18-73.0)<br>0.40 | 1.49<br>(0.08-29.3)<br>0.79                           | <b>30.1</b><br><b>(3.85-236)</b><br><b>0.001</b>  | <b>19.2</b><br><b>(2.39-154)</b><br><b>0.005</b> | 17.1<br>(0.77-382)<br>0.07                       | 11.8<br>(0.55-253)<br>0.11                       | <b>8.4</b><br><b>(1.09-64.0)</b><br><b>0.04</b>       | 4.03<br>(0.52-31.0)<br>0.18                           |
|                                                         | Egg<br>(n=20)                                             | 2.00<br>(0.36-11.2)<br>0.43 | <b>15.7</b><br><b>(6.13-40.2)</b><br><b>&lt;0.001</b> | <b>4.95</b><br><b>(1.63-15.0)</b><br><b>0.005</b> | 0.71<br>(0.04-12.2)<br>0.81                      | 2.83<br>(0.15-54.4)<br>0.49                      | <b>7.29</b><br><b>(1.13-46.9)</b><br><b>0.04</b> | <b>15.9</b><br><b>(5.83-43.2)</b><br><b>&lt;0.001</b> | <b>7.57</b><br><b>(3.09-18.5)</b><br><b>&lt;0.001</b> |
|                                                         | Peanut<br>(n=7)                                           | 6.18<br>(0.99-38.6)<br>0.05 | 2.40<br>(0.40-14.5)<br>0.34                           | 4.01<br>(0.65-24.6)<br>0.13                       | 2.00<br>(0.11-36.4)<br>0.64                      | 7.96<br>(0.39-161)<br>0.18                       | 5.49<br>(0.28-107)<br>0.26                       | 2.24<br>(0.49-10.1)<br>0.30                           | 3.14<br>(0.69-14.3)<br>0.14                           |
|                                                         |                                                           | Peanut<br>(n=22)            | Egg<br>(n=52)                                         | Milk<br>(n=33)                                    | Sesame<br>(n=18)                                 | Fish<br>(n=6)                                    | Wheat<br>(n=6)                                   | Any IgE-<br>type<br>symptoms<br>(n=99)                | Any non-<br>IgE-type<br>symptoms<br>(n=82)            |
| Food-specific IgE-type symptoms reported up to 6 months |                                                           |                             |                                                       |                                                   |                                                  |                                                  |                                                  |                                                       |                                                       |
