# Supplementary material for: Factors influencing adherence in a trial of early introduction of allergenic food
Source: PubMed Central journal article supplement (PMC6904906; doi:10.1016/j.jaci.2019.06.046), 2019-12
Supplement: mmc11.pdf [file mmc11.pdf]

**White (n=816)**

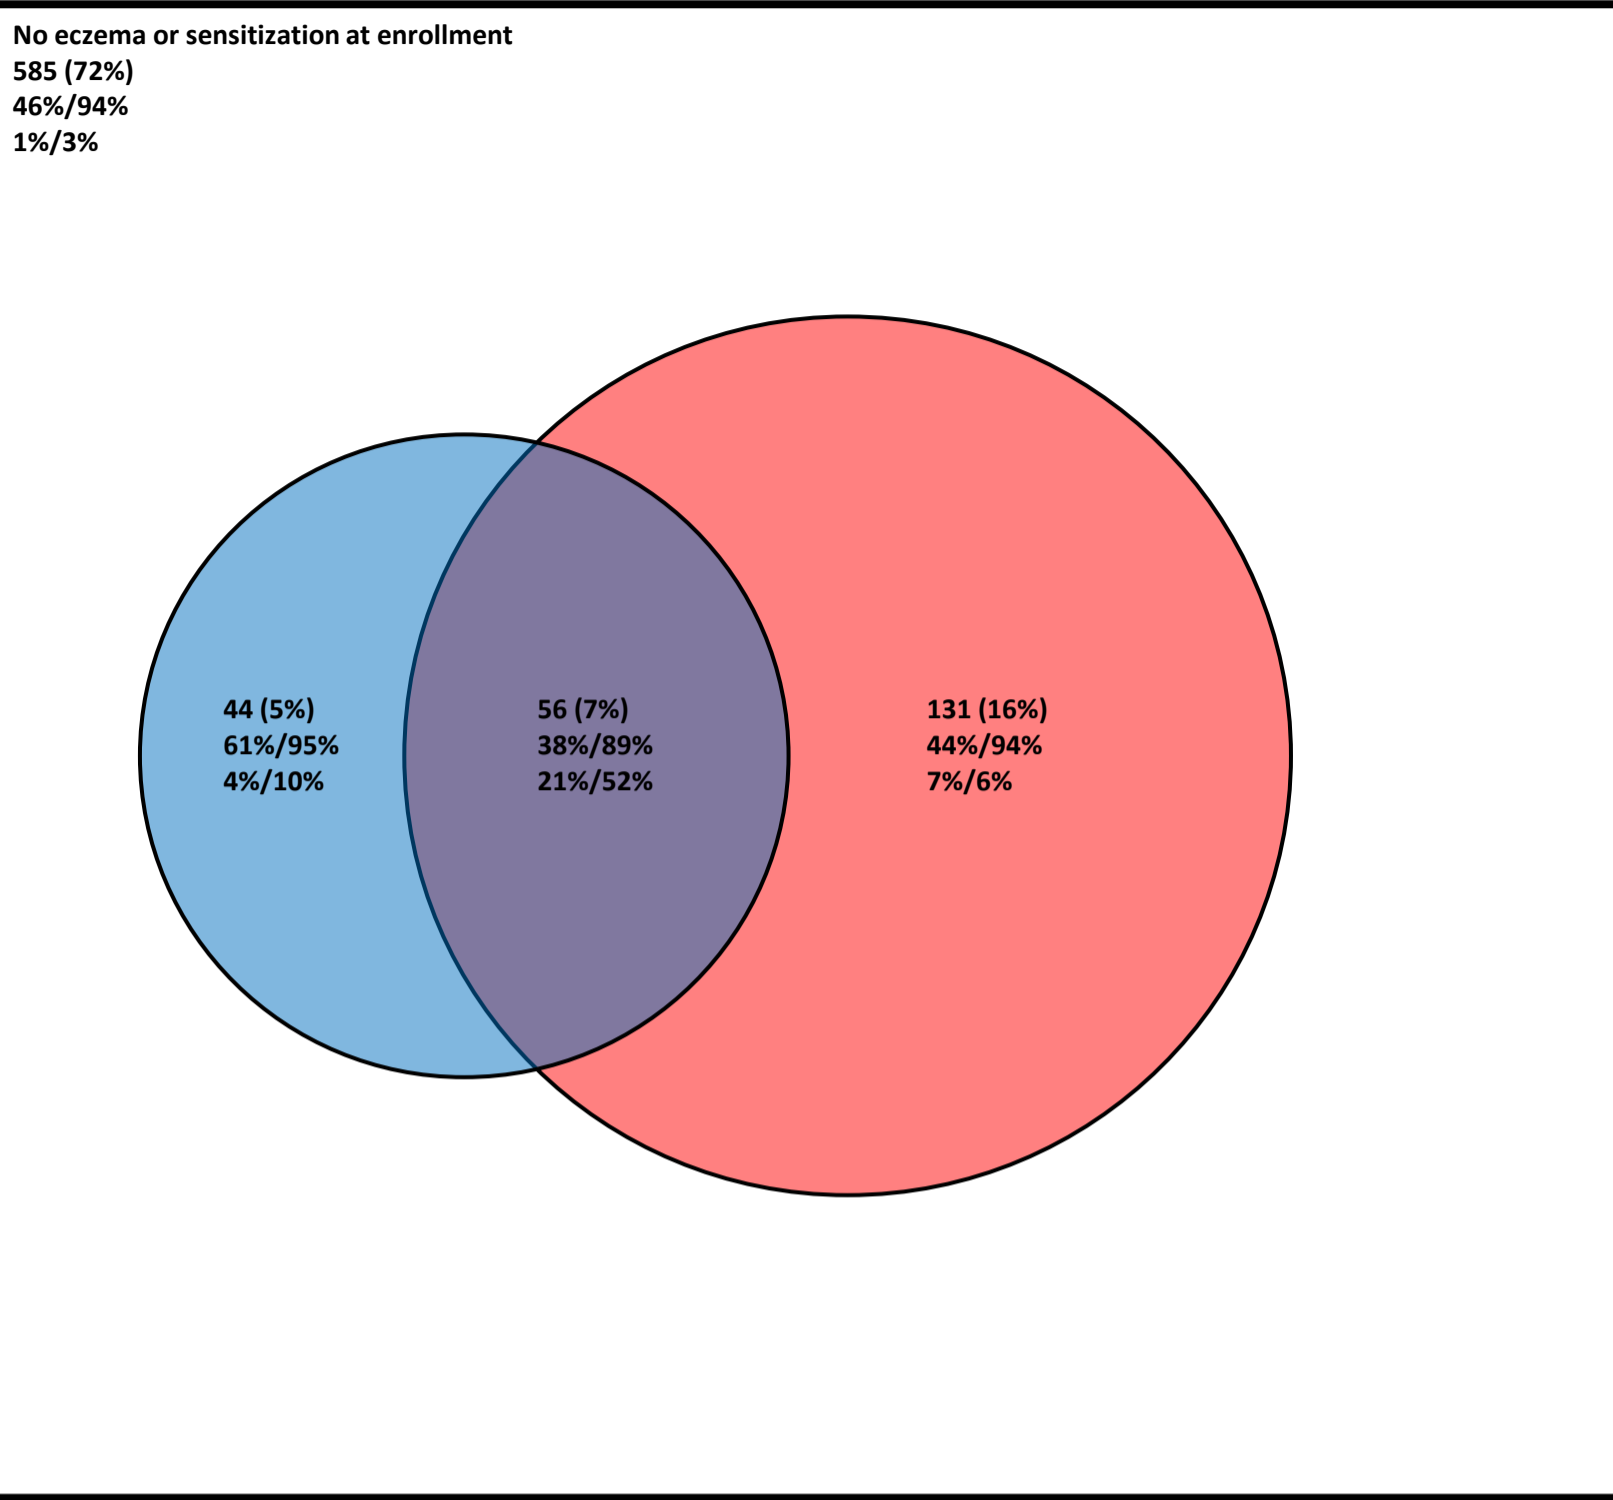

**Nonwhite (n=126)**

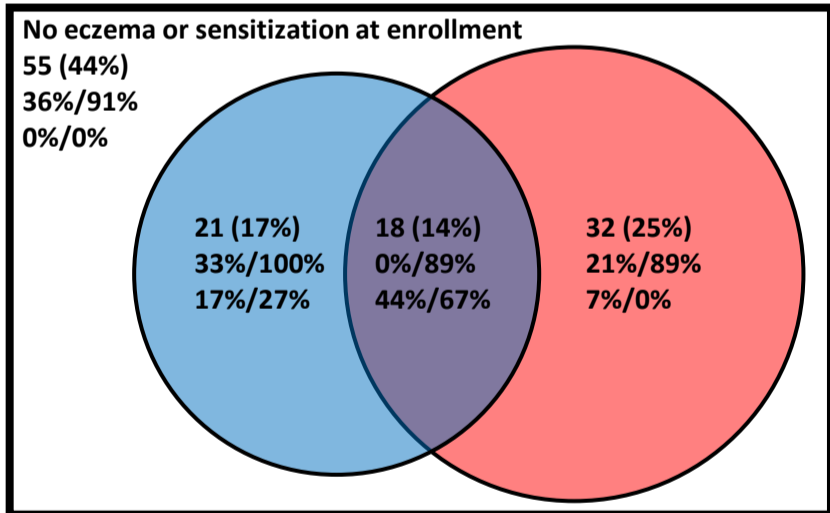

**Key**

■ IgE sensitized (≥0.1kU/l) one or more foods

■ Visible eczema at enrollment

N (%) in each region

Probability of EIG/SIG per-protocol adherence

Probability of food allergy EIG/SIG
